# Supplementary material for: Construction of flower-like MoS2/Fe3O4/rGO composite with enhanced photo-Fenton like catalyst performance
Source: Royal Society of Chemistry journal article supplement (doi:10.1039/c8ra06537c), 2018-01-01
Supplement: c8ra06537c1.pdf [file c8ra06537c1.pdf]

**Supporting Information**

**for**

**Construction of flower-like MoS<sub>2</sub>/Fe<sub>3</sub>O<sub>4</sub>/rGO composite  
with enhanced photo-Fenton like catalyst performance**

Dongzhao Mu<sup>‡a</sup>, Zhe Chen<sup>‡a\*</sup>, Hongfei Shi<sup>a\*</sup> and Naidi Tan<sup>a\*</sup>

<sup>a</sup>.*School of Science, Jilin Institute of Chemical Technology, Jilin 132022, PR  
China, E-mail: chenzhecz999@163.com*

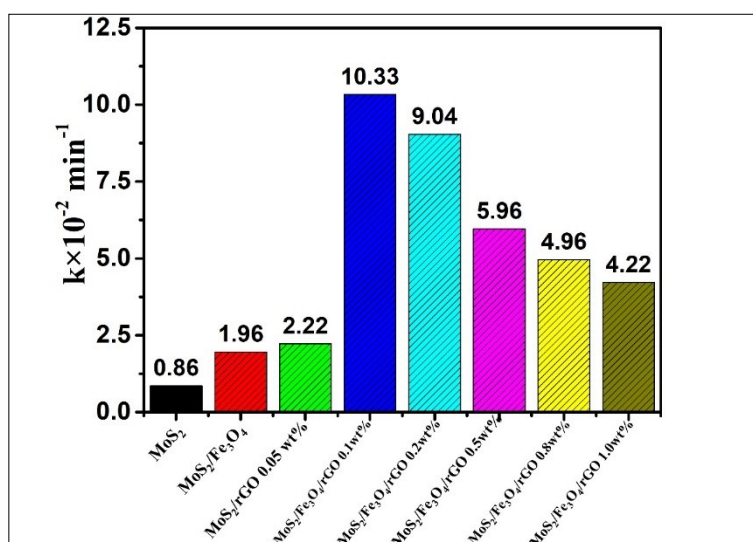

Fig. S1 The reaction rate constant ( $k$  values) of different samples in the photocatalytic degradation of RhB.
